# Supplementary material for: Wnt/β-catenin pathway is a key signaling pathway to trastuzumab resistance in gastric cancer cells
Source: PubMed Central journal article supplement (PMC10542239; doi:10.1186/s12885-023-11447-4), 2023-09-29

# Image quant Las4000

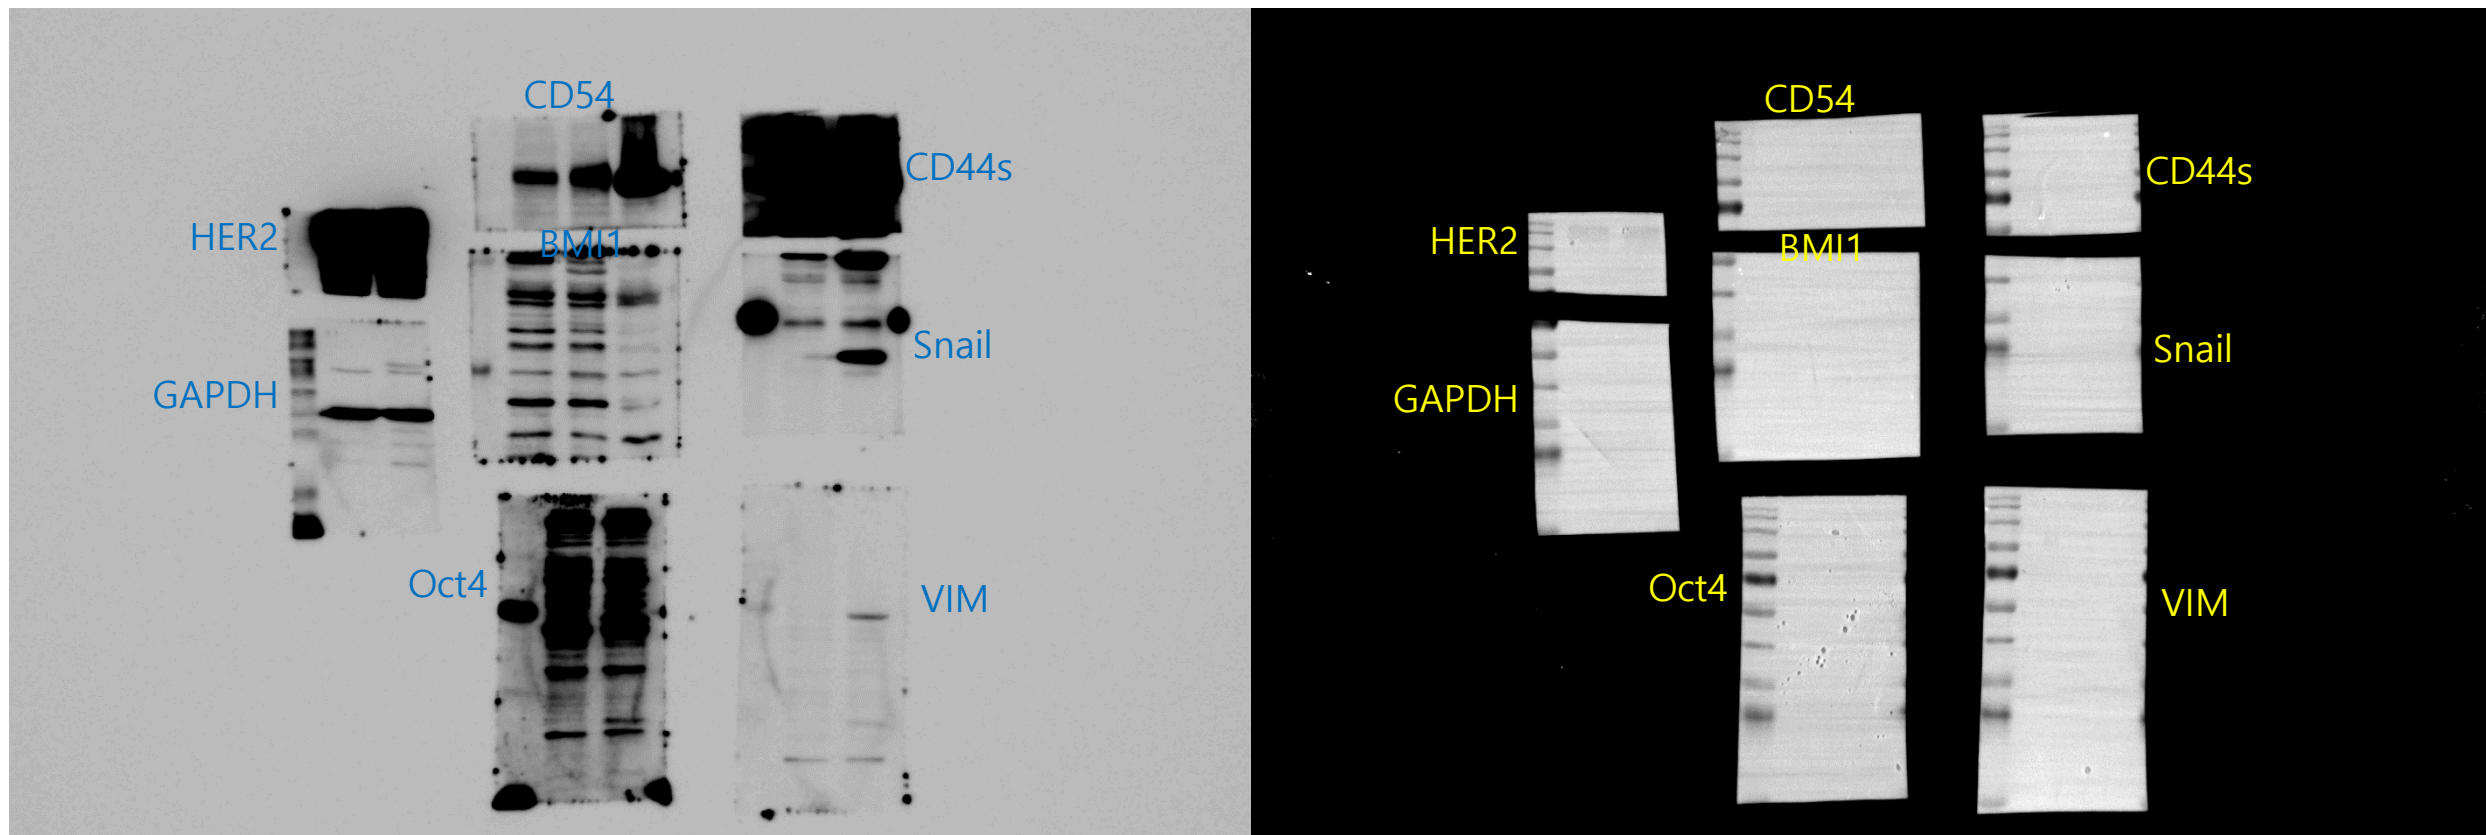

# Film develop

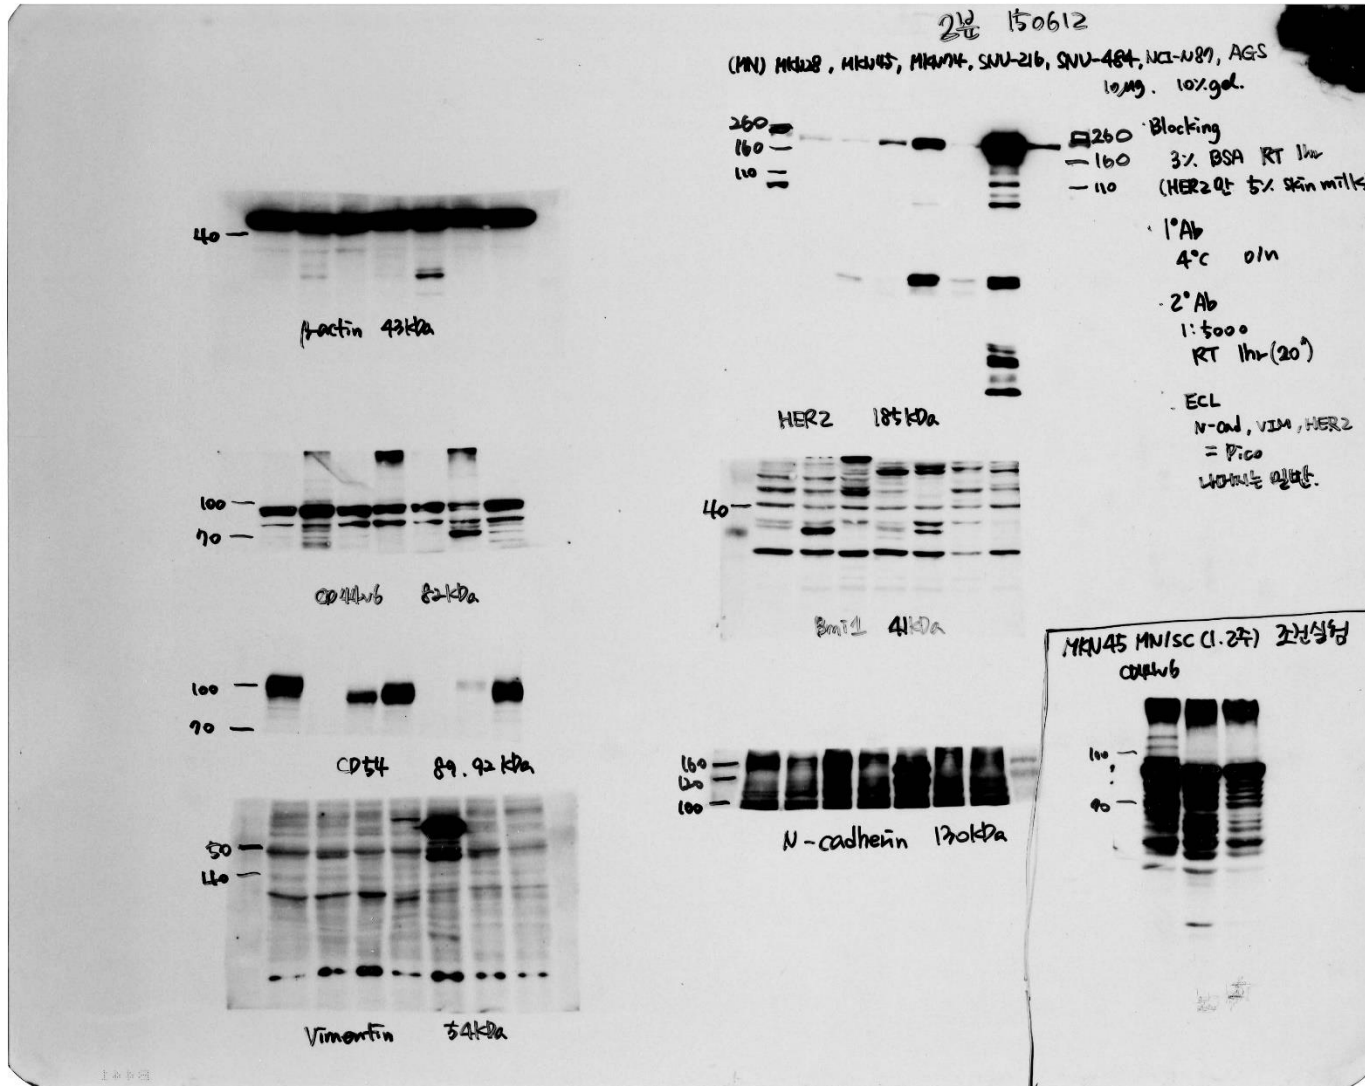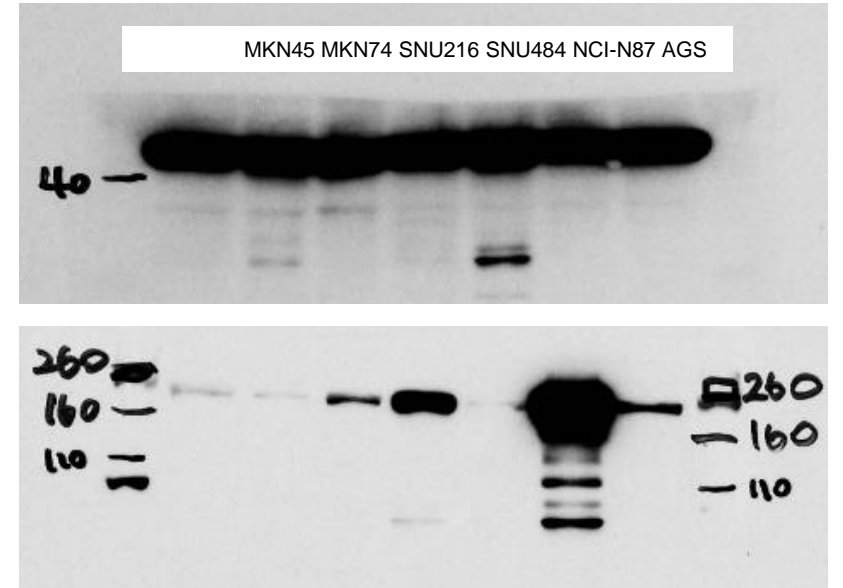

Supplement: 12885_2023_11447_MOESM1_ESM.pdf [file 12885_2023_11447_MOESM1_ESM.pdf]
